# Supplementary material for: Encapsulating NH4Br in a metal organic framework: achieving remarkable proton conduction in a wide relative humidity range
Source: Royal Society of Chemistry journal article supplement (doi:10.1039/d1dt02253a), 2021-01-01
Supplement: d1dt02253a1.pdf [file d1dt02253a1.pdf]

## Electronic Supplementary Material (ESI)

### **Encapsulating NH<sub>4</sub>Br in metal organic framework: achieving remarkable proton conduction in wide relative humidity range**

Yihan Du<sup>aφ</sup>, Kun Zhang<sup>aφ</sup>, Ziya Liu<sup>aφ</sup>, Shaoxian Liu<sup>b</sup>, Guoji Huang<sup>a</sup>, Yang Huang<sup>c</sup>, Qianqian Qin<sup>a</sup>, Jiaxin Luo<sup>a</sup>, Bingqing Xu<sup>a\*</sup>, Gen Zhang<sup>a\*</sup>

*<sup>a</sup> Key Laboratory for Soft Chemistry and Functional Materials of Ministry of Education, School of Chemistry and Chemical Engineering, Nanjing University of Science and Technology, Nanjing, Jiangsu 210094, China*

*<sup>b</sup> School of Environmental Science, Nanjing Xiaozhuang University, Nanjing, Jiangsu 211171, China*

*<sup>c</sup> Jiangsu Co-Innovation Center of Efficient Processing and Utilization of Forest Resources, and Joint International Research Lab of Lignocellulosic Functional Materials, Nanjing Forestry University, Nanjing, Jiangsu 210037, China*

\* Correspondence authors

E-mail: [bingqingxu@njust.edu.cn](mailto:bingqingxu@njust.edu.cn) (B.X)

E-mail: [zhanggen@njust.edu.cn](mailto:zhanggen@njust.edu.cn) (G.Z.)

## Experimental section

### 1.1 Reagents.

$\text{Cr}(\text{NO}_3)_3 \cdot 9\text{H}_2\text{O}$  (99%), Terephthalic Acid (99%), HF (40% aqueous solution) and  $\text{NH}_4\text{Br}$  (98%) were supplied by Sinopharm Chemical Reagent Co. Ltd. of China. All chemical reagents were used as received without further purification.

### 1.2 Synthesis of MIL-101-Cr.

According to the literature,<sup>42</sup> 1.2 g  $\text{Cr}(\text{NO}_3)_3 \cdot 9\text{H}_2\text{O}$  and 500 mg Terephthalic Acid were mixed with 15 mL deionized water and 1 mL HF (3mol/L). The reactant was heated to a reaction kettle and heated to 493 K for 6 hours, and the crude product was filtered after cooling. The crude products were heated at 343 K in DMF solution for 3 hours, then heated for 3 hours at 343 K in the ethanol solution. After two times of the above procedure, the sample were placed in DMF solution at 393 K for one week and then filtered. Finally, the product MIL-101-Cr was dried at 353 K.

### 1.3 Synthesis of $\text{NH}_4\text{Br}@$ MIL-101-Cr.

200 mg MIL-101-Cr was placed in 10 mL saturated  $\text{NH}_4\text{Br}$  water solution for 24 hours at 298 K. After that, the product was filtered, washed with few water and was finally dried at 353 K.

### 1.4 General Characterizations.

Powder X-ray diffraction (XRD) data were collected on a Bruker D8 ADVANCE X-ray diffractometer, operated at 40 kV and 40 mA, with Cu  $\text{K}\alpha$  radiation ( $\lambda = 1.5418 \text{ \AA}$ ), and the measurement was performed at ambient temperature in the range of  $2\theta = 5$ -50 degree with 0.02 degree/step. Thermo gravimetric analyses (TG) were performed on a Mettler Toledo TGA/DSC instrument in the range of 303-1073 K under a nitrogen flow (50 mL/min) at a heating rate of  $5 \text{ K min}^{-1}$ . Gas adsorptions were measured on a BELSORP-Max adsorption analyzer. Samples were pretreated under vacuum and 100 °C for 2 hours before adsorption test. Elemental analyses for C, H and N were performed with an Elementar Vario EL III analytic instrument. Infrared spectrum was tested under environmental conditions with a relatively humidity of 47%.

### 1.5 Proton Conductivity Measurement.

Powder sample of  $\text{NH}_4\text{Br}@$ MIL-101-Cr were pressed into a disk-shaped pellet with a diameter of 8 mm and a thickness of 0.70 mm at a pressure of 9 MPa. MIL-101-Cr was pressed to a pellet with a diameter of 8 mm and a thickness of 0.52 mm under same pressure. These pellets were then sandwiched between two platinum electrodes for impedance measurement using a Solart 1260A electrochemistry workstation at open

circuit potential with an amplitude of 10 mV. For all the measurements, the range of frequency was set from 1 to 1M Hz. Proton conductivity was calculated by the formula:

$$\sigma = L / (R \times S) \quad (1)$$

where  $\sigma$  represents proton conductivity, L and S is thickness and area of the pellet, R is resistance of the pellet.

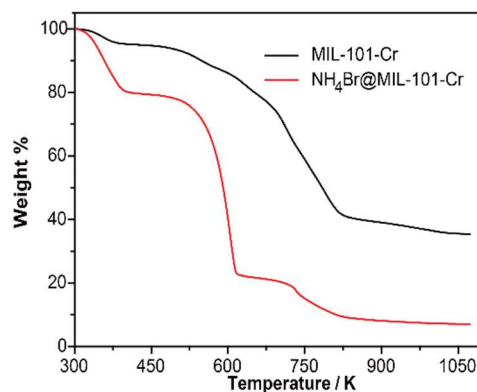

**Figure S1.** TG plot of MIL-101 and NH<sub>4</sub>@MIL-101.

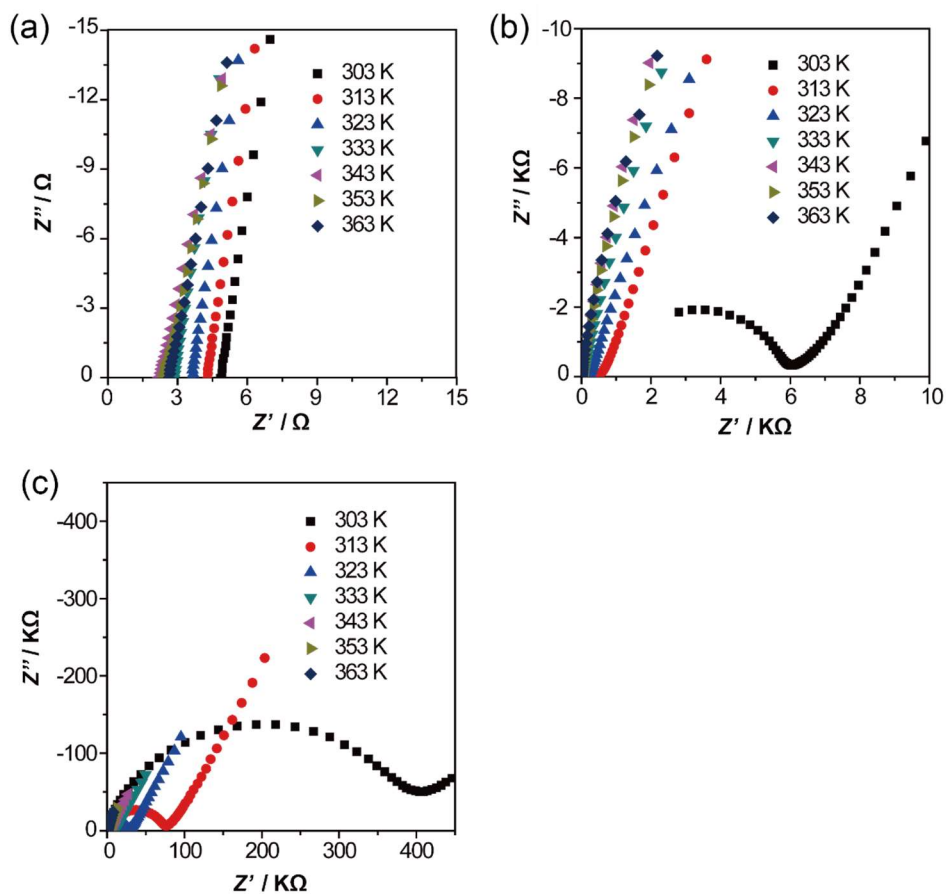

**Figure S2.** (a-c) Variable temperature impedance curves of NH<sub>4</sub>Br@MIL-101-Cr under 75% RH, 60% RH and 45% RH.

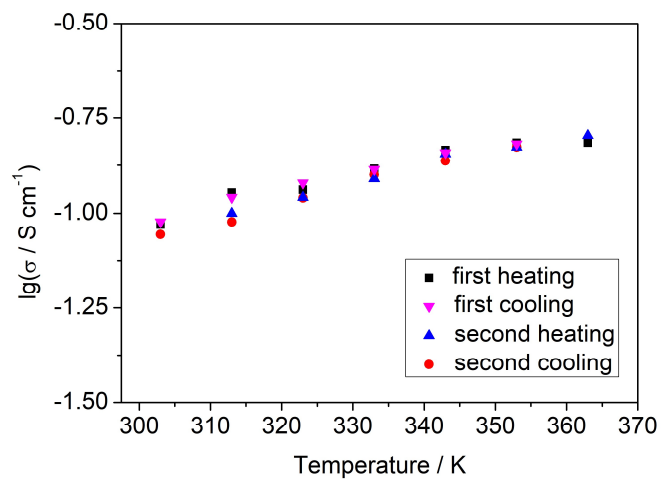

**Figure S3.** Two heating and cooling cycle proton conducting test of  $\text{NH}_4\text{Br@MIL-101}$  in 100% RH

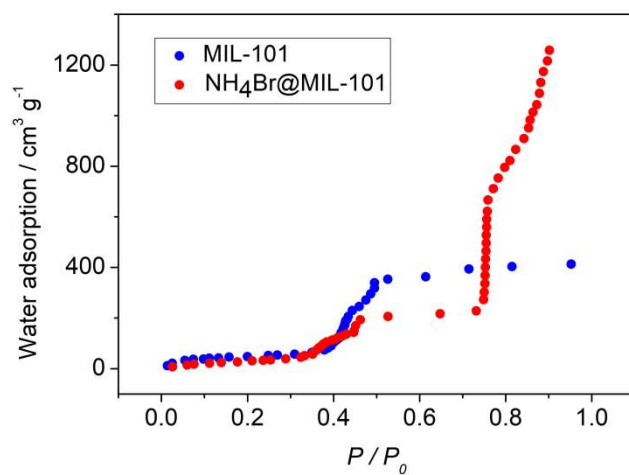

**Figure S4.** Water adsorption of MIL-101 and  $\text{NH}_4\text{Br@MIL-101}$ .

**Table S1.** Elemental analysis for NH<sub>4</sub>Br@MIL-101-Cr (%).

| NH <sub>4</sub> Br@MIL-101-Cr                      |      |      |
|----------------------------------------------------|------|------|
| C                                                  | H    | N    |
| 11.46                                              | 4.28 | 9.26 |
| 11.10                                              | 3.95 | 9.57 |
| 11.32                                              | 4.19 | 9.41 |
| NH <sub>4</sub> Br@MIL-101-Cr after impedance test |      |      |
| 11.51                                              | 4.03 | 9.33 |
| MIL-101-Cr                                         |      |      |
| 35.71                                              | 3.28 | 0.14 |

**Table S2.** Comparison of proton conductivities in some reported MOFs (conductivity over 10<sup>-2</sup> S cm<sup>-1</sup>) and Nafion.

| Compound                                                                                                               | $\sigma / \text{S cm}^{-1}$ | Conditions      | Ref.      |
|------------------------------------------------------------------------------------------------------------------------|-----------------------------|-----------------|-----------|
| H <sub>2</sub> SO <sub>4</sub> @MIL-101                                                                                | $1.0 \times 10^{-2}$        | 423 K, 0.13% RH | 1         |
| PCMOF2 <sub>1/2</sub>                                                                                                  | $2.1 \times 10^{-2}$        | 358 K, 90% RH   | 2         |
| H <sup>+</sup> @Ni <sub>2</sub> (dobdc)(H <sub>2</sub> O) <sub>2</sub>                                                 | $2.2 \times 10^{-2}$        | 353 K, 95% RH   | 3         |
| PCMOF10                                                                                                                | $3.55 \times 10^{-2}$       | 343 K, 95% RH   | 4         |
| [(Me <sub>2</sub> NH <sub>2</sub> ) <sub>3</sub> (SO <sub>4</sub> ) <sub>2</sub> ][Zn <sub>2</sub> (ox) <sub>3</sub> ] | $4.2 \times 10^{-2}$        | 298 K, 98% RH   | 5         |
| Fe-CAT-5                                                                                                               | $5 \times 10^{-2}$          | 298 K, 98% RH   | 6         |
| TfOH@MIL-101                                                                                                           | $8 \times 10^{-2}$          | 288 K, 60% RH   | 7         |
| UiO-66-(SO <sub>3</sub> H) <sub>2</sub>                                                                                | $8.4 \times 10^{-2}$        | 353 K, 90% RH   | 8         |
| BUT-8(Cr)A                                                                                                             | $1.27 \times 10^{-1}$       | 353 K, 100% RH  | 9         |
| NH <sub>4</sub> Br@MIL-101-Cr                                                                                          | $1.53 \times 10^{-1}$       | 363 K, 100% RH  | This work |

## Reference:

1. Ponomareva, V. G.; Kovalenko, K. A.; Chupakhin, A. P.; Dybtsev, D. N.; Shutova, E. S.; Fedin, V. P. *J. Am. Chem. Soc* 2012, **134**, 15640-15643.
2. Kim, S.; Dawson, K. W.; Gelfand, B. S.; Taylor, J. M.; Shimizu, G. K. *J Am Chem Soc* 2013, **135**, 963-6.
3. Phang, W. J.; Lee, W. R.; Yoo, K.; Ryu, D. W.; Kim, B.; Hong, C. S. *Angew Chem Int Ed Engl* 2014, **53**, 8383-7.
4. Otake, K.-i.; Otsubo, K.; Komatsu, T.; Dekura, S.; Taylor, J. M.; Ikeda, R.; Sugimoto, K.; Fujiwara, A.; Chou, C.-P.; Sakti, A. W.; Nishimura, Y.; Nakai, H.; Kitagawa, H. *Nat. Com* 2020, **11**.
5. Nagarkar, S. S.; Unni, S. M.; Sharma, A.; Kurungot, S.; Ghosh, S. K. *Angew Chem Int Ed Engl* 2014,

53, 2638-42.

6. Nguyen, N. T.; Furukawa, H.; Gandara, F.; Trickett, C. A.; Jeong, H. M.; Cordova, K. E.; Yaghi, O. M. *J Am Chem Soc* 2015, **137**, 15394-7.

7. Dybtsev, D. N.; Ponomareva, V. G.; Aliev, S. B.; Chupakhin, A. P.; Gallyamov, M. R.; Moroz, N. K.; Kolesov, B. A.; Kovalenko, K. A.; Shutova, E. S.; Fedin, V. P. *ACS Appl Mater Interfaces* 2014, **6**, 5161-7.

8. Phang, W. J.; Jo, H.; Lee, W. R.; Song, J. H.; Yoo, K.; Kim, B.; Hong, C. S. *Angew Chem Int Ed Engl* 2015, **54** (17), 5142-6.

9. Dong, X. Y.; Wang, R.; Li, J. B.; Zang, S. Q.; Hou, H. W.; Mak, T. C. *Chem Commun (Camb)* 2013, **49** (90), 10590-2.
